# Supplementary material
Source: PubMed Central journal article supplement (PMC3685285)

## Use of *CBL* exon 8 and 9 mutations in diagnosis of myeloproliferative neoplasms and myelodysplastic/myeloproliferative disorders: an analysis of 636 cases

Susanne Schnittger,<sup>1</sup> Ulrike Bacher,<sup>1,2</sup> Tamara Alpermann,<sup>1</sup> Andreas Reiter,<sup>3</sup> Madlen Ulke,<sup>1</sup> Frank Dicker,<sup>1</sup> Christiane Eder,<sup>1</sup> Alexander Kohlmann,<sup>1</sup> Vera Grossmann,<sup>1</sup> Andreas Kowarsch,<sup>1</sup> Wolfgang Kern,<sup>1</sup> Claudia Haferlach,<sup>1</sup> and Torsten Haferlach<sup>1</sup>

<sup>1</sup>MLL Munich Leukemia Laboratory, Munich; <sup>2</sup>Department for Stem Cell Transplantation, University of Hamburg; and <sup>3</sup>Medizinische Klinik III, Universitätsmedizin Mannheim, Germany

Citation: Schnittger S, Bacher U, Alpermann T, Reiter A, Ulke M, Dicker F, Eder C, Kohlmann A, Grossmann V, Kowarsch A, Kern W, Haferlach C, and Haferlach T. Use of *CBL* exon 8 and 9 mutations in diagnosis of myeloproliferative neoplasms and myelodysplastic/myeloproliferative disorders: an analysis of 636 cases. *Haematologica* 2012;97(12):1890-1894. doi:10.3324/haematol.2012.065375

**Online Supplementary Table S1.** Frequency of *CBL*<sup>mut</sup> in distinct cytogenetic subgroups (*P* values were calculated comparing patients carrying the respective cytogenetic alteration with patients without).

| Cytogenetic subgroup                      | N. of patients | <i>CBL</i> <sup>mut</sup> | <i>P</i> |
|-------------------------------------------|----------------|---------------------------|----------|
| Normal karyotype                          | 494            | 45 (9.1%)                 | n.s.     |
| -Y as sole alteration                     | 21             | 4 (19.0%)                 | n.s.     |
| Gain of 1q                                | 5              | 0 (0.0%)                  | n.s.     |
| Monosomy 7                                | 9              | 4 (44.4%)                 | 0.008    |
| Sole trisomy 8                            | 34             | 2 (5.9%)                  | n.s.     |
| Sole 12p deletion                         | 5              | 0 (0.0%)                  | n.s.     |
| Sole 20q deletion                         | 9              | 1 (11.1%)                 | n.s.     |
| Complex karyotype (≥3 clonal alterations) | 9              | 0 (0.0%)                  | n.s.     |
| Reciprocal translocations                 | 12             | 0 (0.0%)                  | n.s.     |
| Other trisomies                           | 13             | 0 (0.0%)                  | n.s.     |
| Other alterations                         | 21             | 6 (28.6%)                 | 0.012    |
| <b>Total</b>                              | <b>636</b>     | <b>63/636 (9.9%)</b>      | -        |

**Online Supplementary Table S2.** Comparison of biological characteristics and peripheral blood values in *CBL*<sup>mut</sup> (n=38) and *CBL*<sup>wt</sup> (n=240) patients in the CMML cohort (n=278).

| Parameter                                        | <i>CBL</i> <sup>mut</sup> | <i>CBL</i> <sup>wt</sup> | <i>P</i> |
|--------------------------------------------------|---------------------------|--------------------------|----------|
| Male/female (ratio)                              | 40/8 (5.0)                | 154/76 (2.0)             | 0.025    |
| Median age, years (range)                        | 73.6 (42.3-88.3)          | 72.5 (21.9-93.3)         | n.s.     |
| Median WBC count, ×10 <sup>9</sup> /L (range)    | 17.9 (3.2-92.3)           | 13.0 (0.9-129.2)         | n.s.     |
| Median hemoglobin level, g/dL (range)            | 11.2 (7.6-14.2)           | 10.9 (4.0-18.2)          | n.s.     |
| Median thrombocytes, ×10 <sup>9</sup> /L (range) | 79 (3-139)                | 92 (5-1,119)             | n.s.     |

WBC: white blood cells.

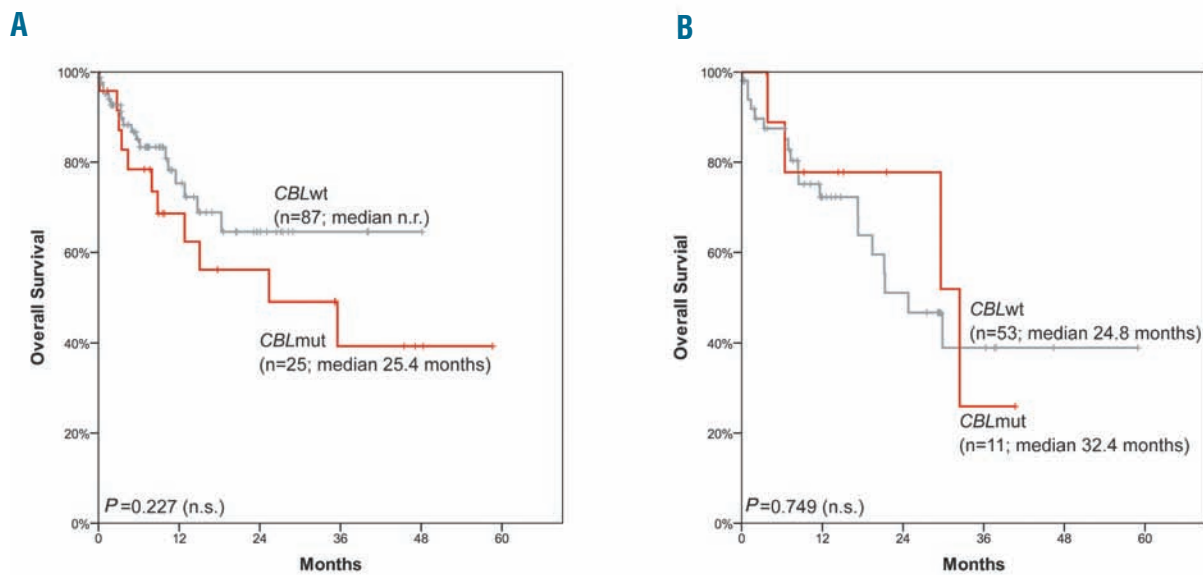

Supplement: supp_2012.065375_2012.065375.SCHNITTGER_SUPPL.pdf [file supp_2012.065375_2012.065375.SCHNITTGER_SUPPL.pdf]
