# Supplementary material
Source: PubMed Central journal article supplement (PMC3685285)
Supplement: supp_2012.065375_2012_065375-Contributions.pdf [file supp_2012.065375_2012_065375-Contributions.pdf]

**Manuscript no. HAEMATOL/2012/065375 entitled “Use of CBL exon 8 and 9 mutations in diagnosis of myeloproliferative neoplasms and myeloproliferative/myelodysplastic disorders: an analysis of 636 cases“**

**Authors: Susanne Schnittger, Ulrike Bacher, Tamara Alpermann, Andreas Reiter, Madlen Ulke, Frank Dicker, Christiane Eder, Alexander Kohlmann, Vera Grossmann, Andreas Kowarsch, Wolfgang Kern, Claudia Haferlach, Torsten Haferlach**

**Information about the contributions of each person named as having participated in the study**

**1) Guarantor(s)**, i.e., person(s) who is (are) responsible for the integrity of the work as a whole:  
• Susanne Schnittger, Munich Leukemia Laboratory, Susanne.schnittger@mll.com

According to the International Committee of Medical Journal Editors (ICMJE) ([http://www.icmje.org/ethical\\_1author.html](http://www.icmje.org/ethical_1author.html)): “*Authorship credit should be based on: 1) substantial contributions to conception and design, acquisition of data, or analysis and interpretation of data; 2) drafting the article or revising it critically for important intellectual content; and 3) final approval of the version to be published. Authors should meet conditions 1, 2, and 3 ..... Acquisition of funding, collection of data, or general supervision of the research group alone does not constitute authorship*”.

**The guarantors of this manuscript confirm that all persons designated as authors qualify for authorship, and that each author has participated sufficiently in the work to take public responsibility for appropriate portions of the content.**

**2) Authors who participated in the conception of the study:** Susanne Schnittger; Ulrike Bacher

**3) Design & Methods.** The following authors were responsible for specific investigations (please detail):  
• Susanne Schnittger, Ulrike Bacher, Andreas Reiter, Wolfgang Kern, Claudia Haferlach, Torsten Haferlach

**4) Results.** The following authors were responsible for specific portions of the results, including figures and tables (please indicate the person responsible for each figure and each table):  
• Susanne Schnittger (molecular genetics; Figure1A)  
• Ulrike Bacher (morphology;Table1)  
• Tamara Alpermann (statistics, Table2,Figure S1)  
• Andreas Reiter (clinical data)  
• Madlen Ulke (molecular genetics)  
• Frank Dicker (molecular genetics)  
• Christiane Eder (molecular genetics)  
• Alexander Kohlmann (molecular genetics)  
• Vera Grossmann (molecular genetics)  
• Andreas Kowarsch (statistics, Figure1B)  
• Wolfgang Kern (statistics)  
• Claudia Haferlach (cytogenetics)  
• Torsten Haferlach (morphology)

**5) Writing the manuscript.** The following authors were responsible for writing the manuscript:  
• Susanne Schnittger, Ulrike Bacher, Tamara Alpermann, Andreas Reiter, Frank Dicker, Alexander Kohlmann, Vera Grossmann, Andreas Kowarsch, Wolfgang Kern, Claudia Haferlach, Torsten Haferlach

**6) Contributors Listed in Acknowledgments:** none
